# Supplementary material
Source: PubMed Central journal article supplement (PMC8085766)

## Supplemental Online Content

Macias BR, Ferguson CR, Patel N, et al. Changes in the optic nerve head and choroid over 1 year of spaceflight. *JAMA Ophthalmol*. Published online April 29, 2021.  
doi:10.1001/jamaophthalmol.2021.0931

**eFigure 1.** Example Bruch membrane layer segmentation for macular choroidal fold analysis

**eFigure 2.** Fundus images of S1 during the one-year mission

This supplemental material has been provided by the authors to give readers additional information about their work.

**eFigure 1. Example Bruch membrane layer segmentation for macular choroidal fold analysis.** Macular OCT B-scan in S1 with internal limiting membrane (blue) and Bruch's membrane (red) layer segmentation before flight and after 270 days of spaceflight.

PREFLIGHT

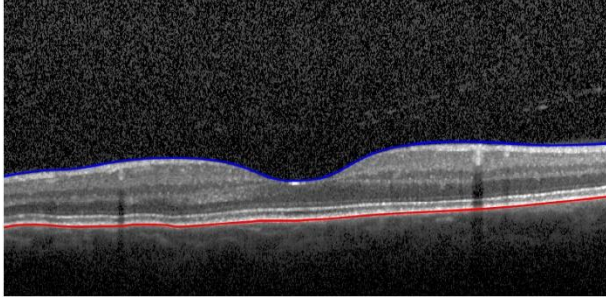

FD270

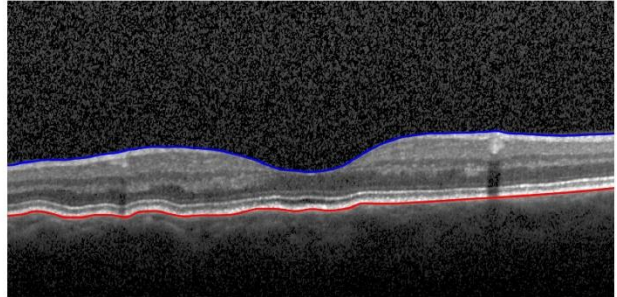

**eFigure 2. Fundus images of S1 during the one-year mission.** S1 first presented with bilateral optic disc edema Frisè grade 1 after 34 days of spaceflight. Optic disc edema in this subject persisted throughout the duration of the flight and resolved between 30 and 90 days after return to Earth.

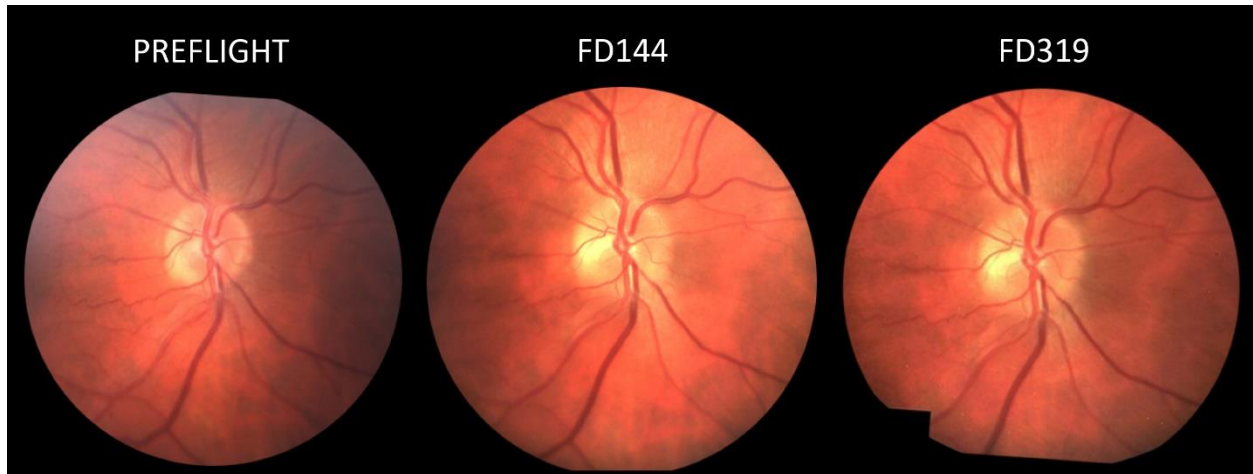

Supplement: jamaophthalmol-e210931-s001.pdf [file jamaophthalmol-e210931-s001.pdf]
